# Supplementary material for: Advances in antibacterial agents for Mycobacterium fortuitum
Source: Royal Society of Chemistry journal article supplement (doi:10.1039/d4md00508b), 2024-10-18
Supplement: d4md00508b1.pdf [file d4md00508b1.pdf]

Supplementary Information

for

**Advances in antibacterial agents for *Mycobacterium fortuitum***

Carlos Roberto Tavorari Jortieke, Angélica Rocha Joaquim, and Fernando Fumagalli

**Contents:**

|                                                                                                                 |    |
|-----------------------------------------------------------------------------------------------------------------|----|
| <b>Figure S1.</b> Relationship between Ligand Lipophilicity Efficiency (LLE) vs antimycobacterial potency. .... | S2 |
| <b>Figure S2.</b> Relationship between Ligand Efficiency (LE) vs antimycobacterial potency. ....                | S2 |
| <b>Figure S3.</b> Relationship between Hydrogen Bond Acceptor (HBA) vs antimycobacterial potency. ....          | S3 |
| <b>Figure S4.</b> Relationship between Hydrogen Bond Donor (HBA) vs antimycobacterial potency. ....             | S4 |
| <b>Figure S5.</b> Relationship between Molecular Weight (MW) vs antimycobacterial potency. ....                 | S4 |
| <b>Figure S6.</b> Relationship between calculated LogP (cLogP) vs antimycobacterial potency. ....               | S4 |
| <b>Figure S7.</b> Relationship between Topological Polar Surface Area (TPSA) vs antimycobacterial potency. .... | S5 |
| <b>Figure S8.</b> Relationship between Rotatable Bonds vs antimycobacterial potency. ....                       | S5 |

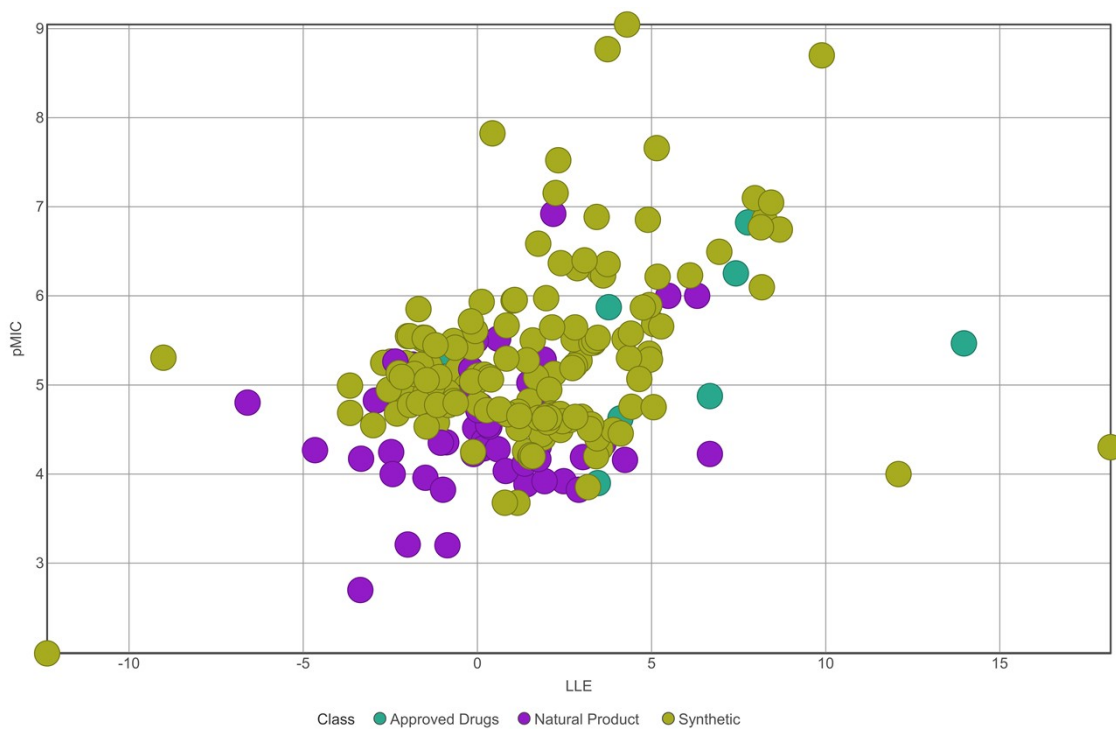

**Figure S1.** Relationship between Ligand Lipophilicity Efficiency (LLE) vs antimycobacterial potency.  
 $LLE = pMIC - cLogP$

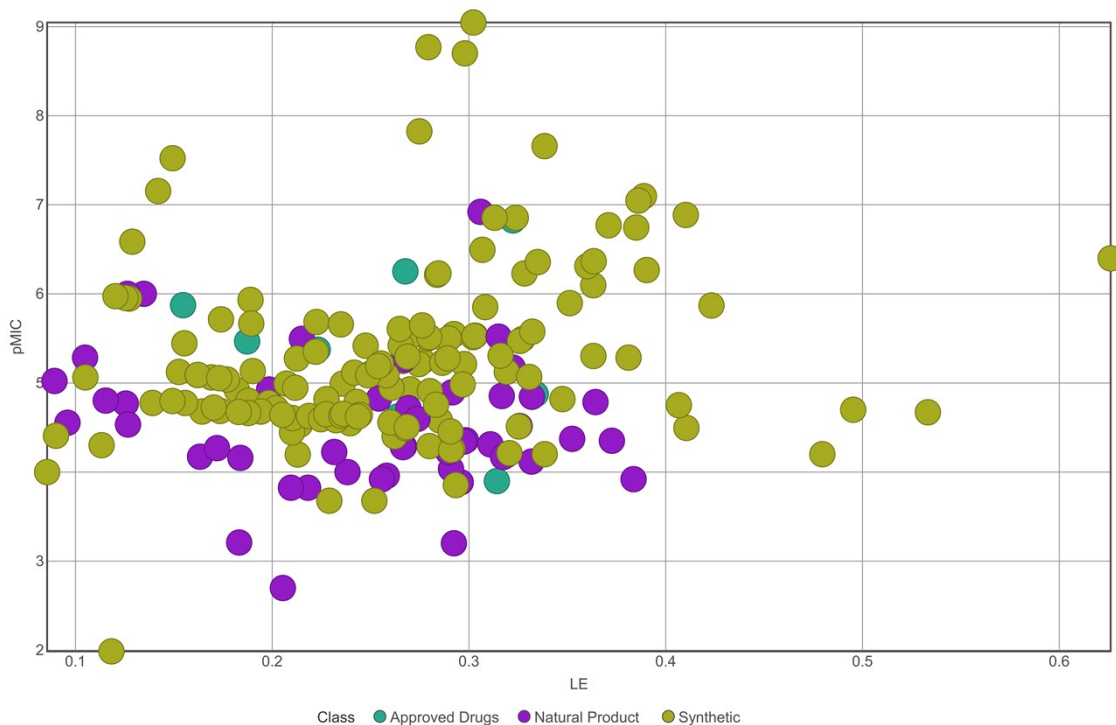

**Figure S2.** Relationship between Ligand Efficiency (LE) vs antimycobacterial potency.  
 $LE = (1.37/Heavy\ atoms) * pMIC$

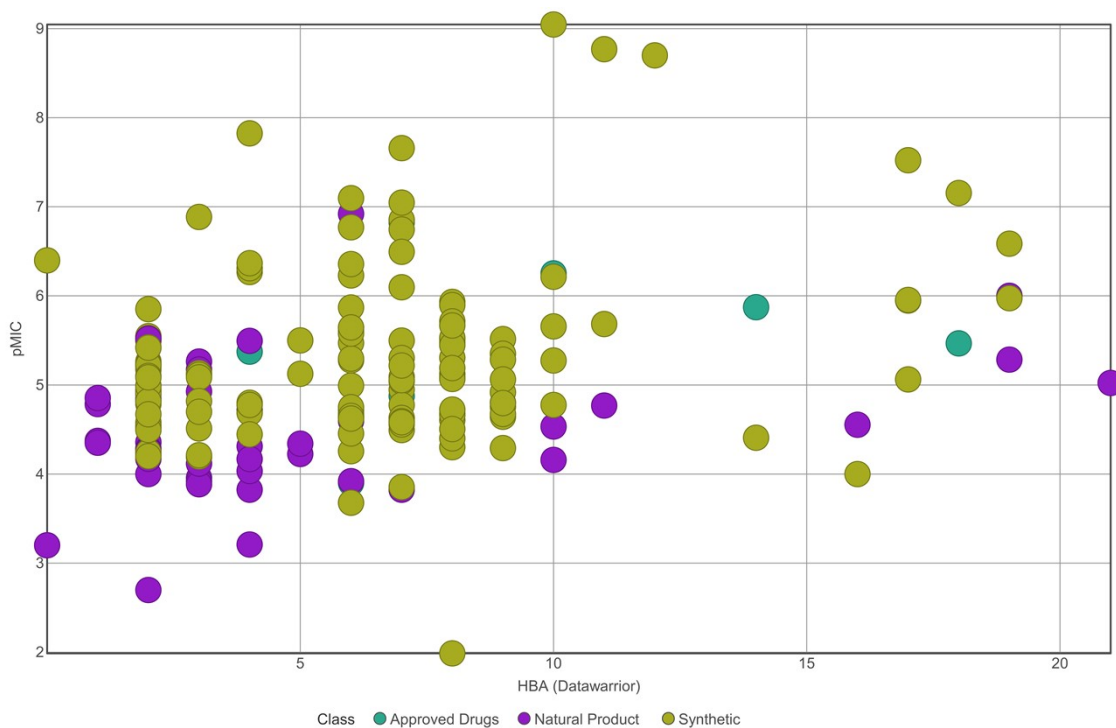

**Figure S3.** Relationship between Hydrogen Bond Acceptor (HBA) vs antimycobacterial potency.

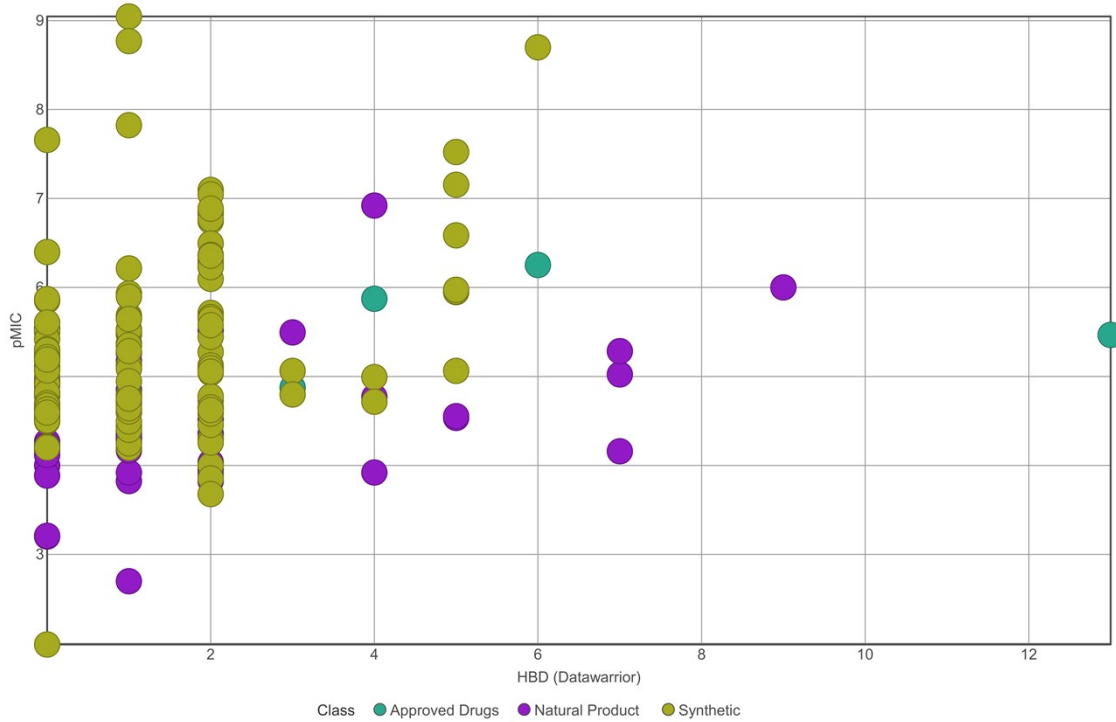

**Figure S4.** Relationship between Hydrogen Bond Donor (HBD) vs antimycobacterial potency.

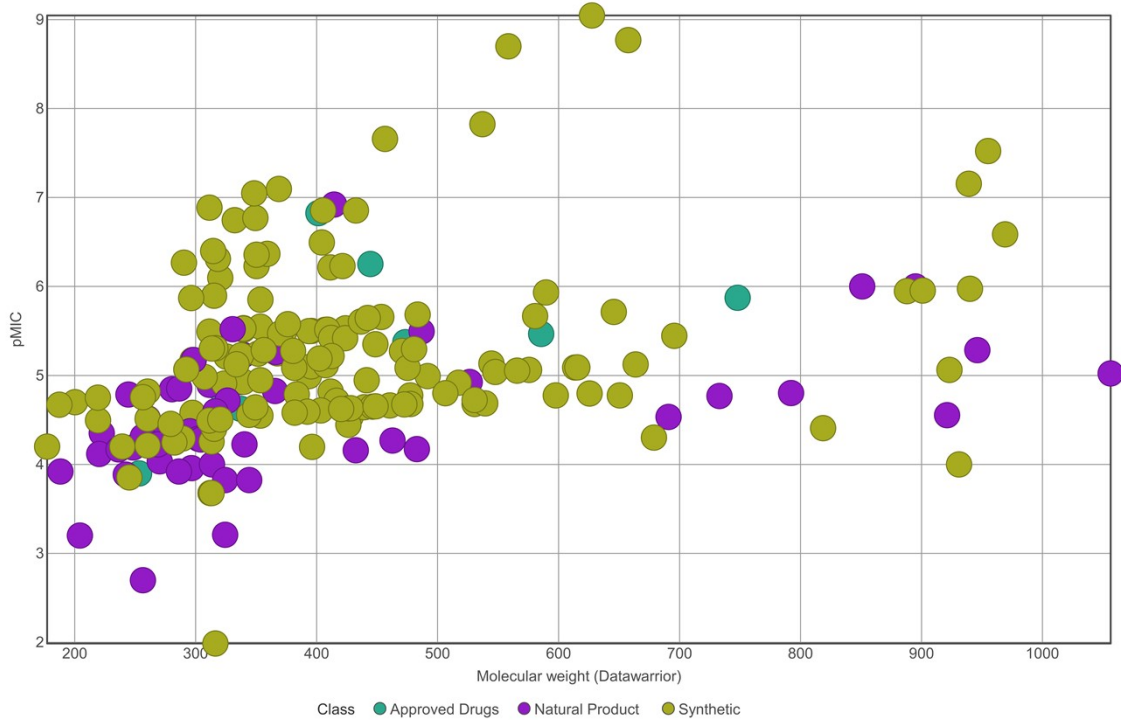

**Figure S5.** Relationship between Molecular Weight (MW) vs antimycobacterial potency.

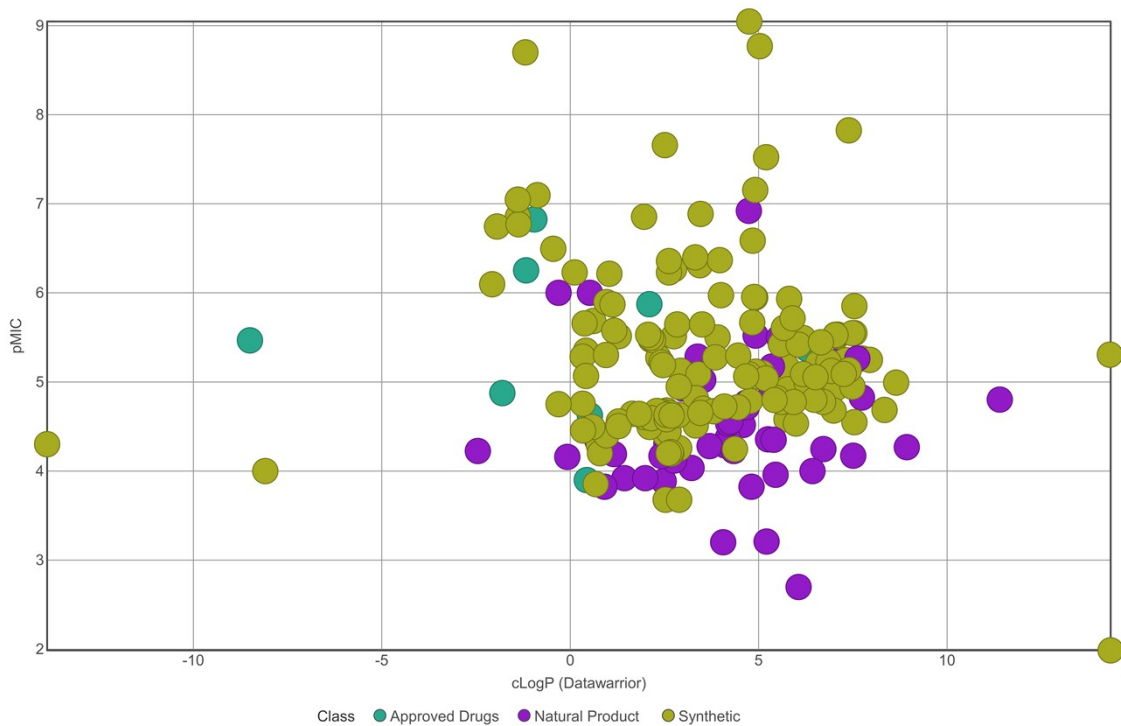

**Figure S6.** Relationship between calculated LogP (cLogP) vs antimycobacterial potency.

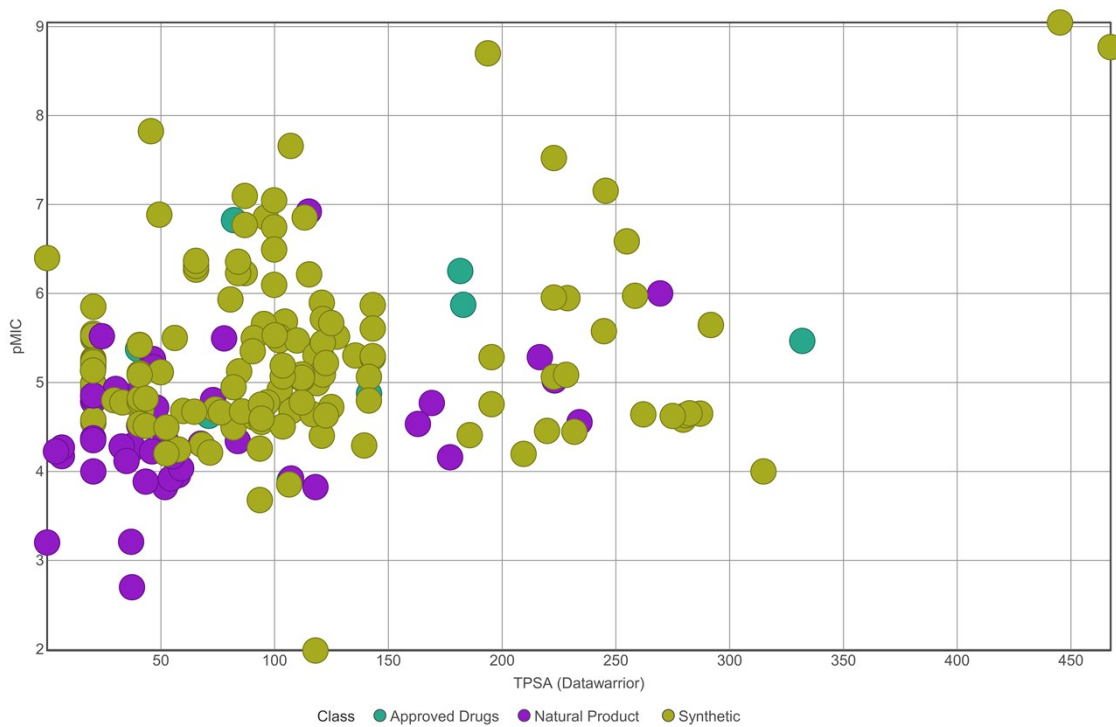

**Figure S7.** Relationship between Topological Polar Surface Area (TPSA) vs antimycobacterial potency.

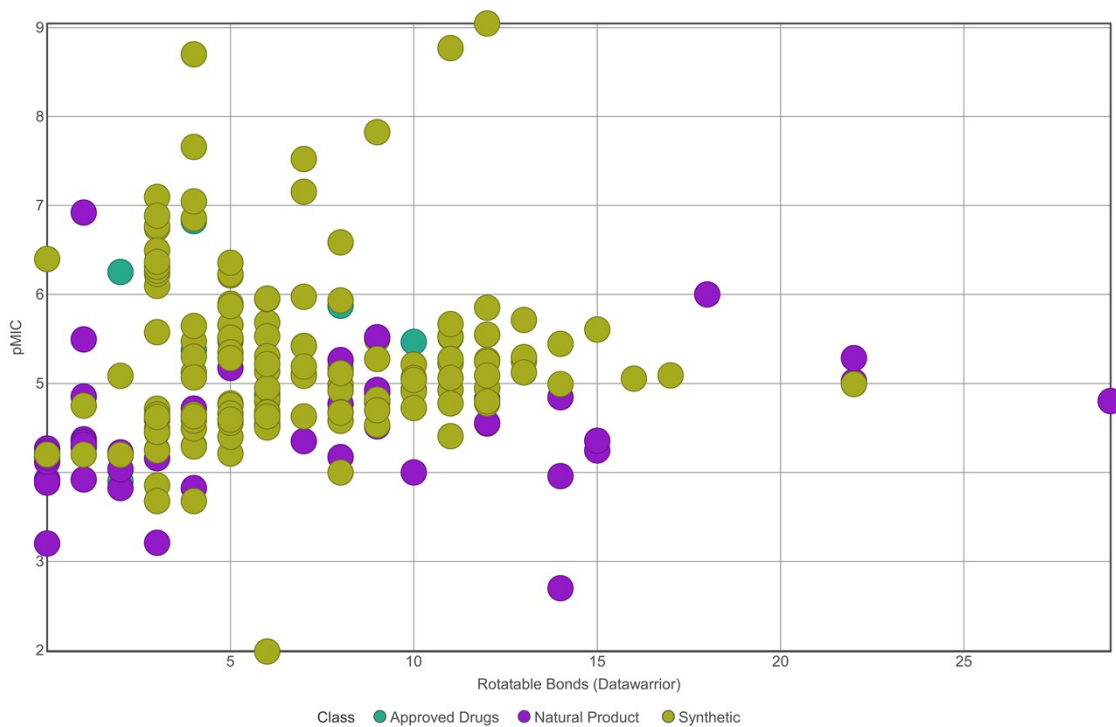

**Figure S8.** Relationship between Rotatable Bonds vs antimycobacterial potency.
