# Supplementary material for: Advances in antibacterial agents for Mycobacterium fortuitum
Source: Royal Society of Chemistry journal article supplement (doi:10.1039/d4md00508b), 2024-10-18
Supplement: d4md00508b2.xlsx [file d4md00508b2.xlsx]

## Sheet: Planilha1
Class	SubClass	Smile	MICATCC6841 (µM)	MICATCC19542(µM)	MICATCC9820 (µM)	MICATCC49404 (µM)	MICATCC35931 (µM)	MICPCM672 (µM)	MICDSM4662135931 (µM)	MICNCTC (µM)	MICNCTC10394 (µM)	MICM. Fortuitum B (µM)	MICUnspecified (µM)	MICClinc. Isol. (µM)	Best MIC (M)	pMIC	cLogP (Datawarrior)	Heavy atoms	LLE	LE	Molecular weight (Datawarrior)	HBA (Datawarrior)	HBD (Datawarrior)	TPSA (Datawarrior)	Rotatable Bonds (Datawarrior)	Observation
Approved Drugs	Aminoglycoside	O=C(N[C@H]3[C@H](O[C@H]1O[C@@H]([C@@H](O)[C@H](N)[C@H]1O)CO)[C@@H](O)[C@H](O[C@H]2O[C@H](CN)[C@@H](O)[C@H](O)[C@H]2O)[C@@H](N)C3)[C@@H](O)CCN	3.41	—	—	5.33	—	—	—	—	—	—	—	—	3.41e-06	5.46725	-8.5	40	13.9672	0.187253	585.6	18	13	331.94	10
Approved Drugs	Quinolone	COc1c2c(cc(c1N3C[C@@H]4CCCN[C@@H]4C3)F)c(=O)c(cn2C5CC5)C(=O)O	0.15	—	—	—	—	—	—	—	—	—	—	—	1.5e-07	6.82391	-0.95	29	7.77391	0.322371	401.44	7	2	82.11	4
Approved Drugs	Macrolide	CC[C@@H]1[C@@]([C@@H]([C@H](C(=O)[C@@H](C[C@@]([C@@H]([C@H]([C@@H]([C@H](C(=O)O1)C)O[C@H]2C[C@@]([C@H]([C@@H](O2)C)O)(C)OC)C)O[C@H]3[C@@H]([C@H](C[C@H](O3)C)N(C)C)O)(C)OC)C)C)O)(C)O	1.34	—	—	—	—	—	—	—	—	—	—	—	1.34e-06	5.8729	2.1	52	3.7729	0.154728	747.96	14	4	182.91	8
Approved Drugs	Tetracycline	CN(C)[C@@H]3C(\O)=C(\C(N)=O)C(=O)[C@@]4(O)C(/O)=C2/C(=O)c1c(cccc1O)[C@H](C)[C@H]2[C@H](O)[C@@H]34	0.56	—	—	—	—	—	—	—	—	—	—	—	5.6e-07	6.25181	-1.17	32	7.42181	0.267656	444.4	10	6	181.62	2
Approved Drugs	Carbapenem	O=C(O)/C1=C(\SCC/N=C/N)C[C@H]2N1C(=O)[C@@H]2[C@H](O)C.O	13.36	—	—	—	—	—	—	—	—	—	—	—	1.336e-05	4.87419	-1.8	20	6.67419	0.333882	317.4	7	3	141.52	6
Approved Drugs	Sulfonamide	Nc1ccc(cc1)S(=O)(=O)Nc2cc(C)on2	126.3	—	—	—	—	—	—	—	—	—	—	—	0.0001263	3.8986	0.44	17	3.4586	0.314181	253.3	6	2	106.6	2
Approved Drugs	Oxazolidinone	O=C1O[C@@H](CNC(=O)C)CN1c3cc(F)c(N2CCOCC2)cc3	23.71	—	—	—	—	—	—	—	—	—	—	—	2.371e-05	4.62507	0.52	24	4.10507	0.264014	337.3	7	1	71.11	4
Approved Drugs	Riminophenazine	CC(C)/N=c/1\cc-2n(c3ccccc3nc2cc1Nc4ccc(cc4)Cl)c5ccc(cc5)Cl	4.22	—	—	—	—	—	—	—	—	—	—	—	4.22e-06	5.37469	6.28	33	-0.905312	0.223131	473.4	4	1	39.99	4
Natural Product	Fatty acid related	CCCCCCCCCCCCCCCC(O)=O	2000	—	—	—	—	—	—	—	—	—	—	—	0.002	2.69897	6.06	18	-3.36103	0.205422	256.4	2	1	37.3	14
Natural Product	Fatty acid related	CCCCCCCC/C=C\CCCCCCCC(O)=O	56.64	—	—	—	—	—	—	—	—	—	—	—	5.664e-05	4.24688	6.72	20	-2.47312	0.290911	282.5	2	1	37.3	15
Natural Product	Fatty acid related	CCCCC/C=C\C/C=C\CCCCCCCC(O)=O	14.26	—	—	—	—	—	—	—	—	—	—	—	1.426e-05	4.84588	6.47	20	-1.62412	0.331943	280.4	2	1	37.3	14
Natural Product	Fatty acid related	CCCCCCCCCCC/C=C\C=C\C(O)CC(O)=O	110	—	—	—	—	—	—	—	—	—	—	—	0.00011	3.95861	5.45	21	-1.49139	0.258252	296.5	3	2	57.53	14
Natural Product	Fatty acid related	CCCCCCC/C=C\CC#CC#C[C@@H](O)C=C	16.37	—	—	—	—	—	—	—	—	—	—	—	1.637e-05	4.78595	5.6	18	-0.814049	0.364264	244.4	1	1	20.23	9
Natural Product	Fatty acid related	CCCCCCC/C=C\[C@H](O)C#CC#C[C@H](O)C=C	30.4	—	—	—	—	—	—	—	—	—	—	—	3.04e-05	4.51713	4.58	19	-0.0628736	0.325709	260.4	2	2	40.46	9
Natural Product	Fatty acid related	C[C@@H](N)CCCCCC/C=C\CCCCCCCCN	—	—	—	—	—	—	—	—	—	44	—	—	4.4e-05	4.35655	5.25	20	-0.893453	0.298423	282.5	2	2	52.04	15
Natural Product	Quinolone Fatty acid related	CN1C(CCCCCCCCCCC)=CC(C2=C1C=CC=C2)=O	100	—	—	—	—	—	—	—	—	—	—	—	0.0001	4	6.43	23	-2.43	0.238261	313.48	2	0	20.31	10
Natural Product	Quinolone Fatty acid related	CN1C(CCCCC/C=C\CCCC)=CC(C2=C1C=CC=C2)=O	12.75	—	—	—	—	—	—	—	—	—	—	—	1.275e-05	4.89449	6.18	23	-1.28551	0.291541	311.47	2	0	20.31	9
Natural Product	Quinolone Fatty acid related	CN1C(CCCCCCC/C=C\CCCC)=CC(C2=C1C=CC=C2)=O	5.9	—	—	—	—	—	—	—	—	—	—	—	5.9e-06	5.22915	7.09	25	-1.86085	0.286557	339.52	2	0	20.31	11
Natural Product	Quinolone Fatty acid related	CN1C(CCC/C=C\C/C=C\CCCCC)=CC(C2=C1C=CC=C2)=O	11.85	—	—	—	—	—	—	—	—	—	—	—	1.185e-05	4.92628	6.83	25	-1.90372	0.26996	337.51	2	0	20.31	10
Natural Product	Quinolone Fatty acid related	CN1C(CCCCC/C=C\C/C=C\CCCCC)=CC(C2=C1C=CC=C2)=O	10.94	—	—	—	—	—	—	—	—	—	—	—	1.494e-05	4.82565	7.74	26	-2.91435	0.254275	365.56	2	0	20.31	12
Synthetic	Quinolone Fatty acid related	CN1C(CC/C=C\CCCCCCCCCC)=CC(C2=C1C=CC=C2)=O	2.83	—	—	—	—	—	—	—	—	—	—	—	2.83e-05	4.54821	7.54	26	-2.99179	0.239656	353.55	2	0	20.31	12
Synthetic	Quinolone Fatty acid related	CN1C(CCC/C=C\CCCCCCCCC)=CC(C2=C1C=CC=C2)=O	1.41	—	—	—	—	—	—	—	—	—	—	—	1.41e-06	5.85078	7.54	26	-1.68922	0.308291	353.55	2	0	20.31	12
Synthetic	Quinolone Fatty acid related	CN1C(CCCC/C=C\CCCCCCCC)=CC(C2=C1C=CC=C2)=O	2.83	—	—	—	—	—	—	—	—	—	—	—	2.83e-06	5.54821	7.54	26	-1.99179	0.292348	353.55	2	0	20.31	12
Synthetic	Quinolone Fatty acid related	CN1C(/C=C/CCCCCCCCC)=CC(C2=C1C=CC=C2)=O	3.21	—	—	—	—	—	—	—	—	—	—	—	3.21e-06	5.49349	6.18	23	-0.686505	0.327221	311.47	2	0	20.31	9
Synthetic	Quinolone Fatty acid related	CN1C(C/C=C/CCCCCCCCCC)=CC(C2=C1C=CC=C2)=O	3.06	—	—	—	—	—	—	—	—	—	—	—	3.06e-06	5.51428	7.09	25	-1.57572	0.302182	339.52	2	0	20.31	11
Synthetic	Quinolone Fatty acid related	CN1C(/C=C/CCCCCCCCCCC)=CC(C2=C1C=CC=C2)=O	2.94	—	—	—	—	—	—	—	—	—	—	—	2.94e-06	5.53165	7.09	25	-1.55835	0.303135	339.52	2	0	20.31	11
Synthetic	Quinolone Fatty acid related	CN1C(/C=C/C=C/CCCCCCCCCCC)=CC(C2=C1C=CC=C2)=O	5.47	—	—	—	—	—	—	—	—	—	—	—	5.47e-06	5.26201	7.74	27	-2.47799	0.266998	365.56	2	0	20.31	12
Synthetic	Quinolone Fatty acid related	O=C(C1=C2C=CC=C1)C=C(/C=C/CCCCCCCC)N2CCCC	2.95	—	—	—	—	—	—	—	—	—	—	—	2.95e-06	5.53018	7.04	25	-1.50982	0.303054	339.52	2	0	20.31	11
Synthetic	Quinolone Fatty acid related	O=C(C1=C2C=CC=C1)C=C(/C=C/CCCCCCCCC)N2CCCC	2.83	—	—	—	—	—	—	—	—	—	—	—	2.83e-06	5.54821	7.49	26	-1.94179	0.292348	353.55	2	0	20.31	12
Synthetic	Quinolone Fatty acid related	O=C(C1=C2C=CC=C1)C=C(/C=C/CCCCCCCCCC)N2CC	2.95	—	—	—	—	—	—	—	—	—	—	—	2.98e-06	5.52578	7.04	25	-1.51422	0.302813	339.52	2	0	20.31	11
Synthetic	Quinolone Fatty acid related	O=C(C1=C2C=CC=C1)C=C(C/C=C/CCCCCCCCCC)N2CCC	5.66	—	—	—	—	—	—	—	—	—	—	—	5.66e-06	5.24718	7.95	27	-2.70282	0.266246	367.58	2	0	20.31	13
Synthetic	Quinolone Fatty acid related	O=C(C1=C2C=CC=C1)C=C(C=CCCCCCCCCCC)N2CC=C	5.69	—	—	—	—	—	—	—	—	—	—	—	5.69e-06	5.24489	7.31	26	-2.06511	0.276365	351.53	2	0	20.31	12
Synthetic	Quinolone Fatty acid related	CN1C(CCCCCCC/C=C\C/C=C\CCCCC)=CC(C2=C1C=CC=C2)=O	10.16	—	—	—	—	—	—	—	—	—	—	—	1.016e-05	4.99311	8.65	29	-3.65689	0.235881	393.61	2	0	20.31	14	Not include in the manuscript main text
Synthetic	Quinolone Fatty acid related	CN1C(CCCC/C=C\CCCC)=CC(C2=C1C=CC=C2)=O	26.29	—	—	—	—	—	—	—	—	—	—	—	2.629e-05	4.58021	5.74	22	-1.15979	0.285222	297.44	2	0	20.31	8	Not include in the manuscript main text
Synthetic	Quinolone Fatty acid related	CN1C(/C=C/CCCCCCCC)=CC(C2=C1C=CC=C2)=O	6.72	—	—	—	—	—	—	—	—	—	—	—	6.72e-06	5.17263	5.74	22	-0.567369	0.322114	297.44	2	0	20.31	8	Not include in the manuscript main text
Synthetic	Quinolone Fatty acid related	O=C(C1=C2C=CC=C1)C=C(/C=C/CCCCCCCCC)N2CC	6.15	—	—	—	—	—	—	—	—	—	—	—	6.15e-06	5.21112	6.58	24	-1.36888	0.297468	325.5	2	0	20.31	10	Not include in the manuscript main text
Synthetic	Quinolone Fatty acid related	O=C(C1=C2C=CC=C1)C=C(/C=C/CCCCCCCCCCC)N2CC	11.32	—	—	—	—	—	—	—	—	—	—	—	1.132e-05	4.94615	7.49	26	-2.54385	0.260624	353.55	2	0	20.31	12	Not include in the manuscript main text
Synthetic	Quinolone Fatty acid related	O=C(C1=C2C=CC=C1)C=C(/C=C/CCCCCCCC)N2CCC	6.15	—	—	—	—	—	—	—	—	—	—	—	6.15e-06	5.21112	6.58	26	-1.36888	0.274586	325.49	2	0	20.31	10	Not include in the manuscript main text
Synthetic	Quinolone Fatty acid related	O=C(C1=C2C=CC=C1)C=C(/C=C/CCCCCCCCC)N2CCC	11.79	—	—	—	—	—	—	—	—	—	—	—	1.179e-05	4.92849	7.04	25	-2.11151	0.270081	339.52	2	0	20.31	11	Not include in the manuscript main text
Synthetic	Quinolone Fatty acid related	O=C(C1=C2C=CC=C1)C=C(/C=C/CCCCCCC)N2CCCC	6.15	—	—	—	—	—	—	—	—	—	—	—	6.15e-06	5.21112	6.58	24	-1.36888	0.297468	325.5	2	0	20.31	10	Not include in the manuscript main text
Synthetic	Quinolone Fatty acid related	O=C(C1=C2C=CC=C1)C=C(C=CCCCCCCCC)N2CCCCC	11.32	—	—	—	—	—	—	—	—	—	—	—	1.132e-05	4.94615	7.49	26	-2.54385	0.260624	353.55	2	0	20.31	12	Not include in the manuscript main text
Synthetic	Quinolone Fatty acid related	O=C(C1=C2C=CC=C1)C=C(C=CCCCCCCCCC)N2CC=C	5.93	—	—	—	—	—	—	—	—	—	—	—	5.93e-06	5.22695	6.85	25	-1.62305	0.286437	337.51	2	0	20.31	11	Not include in the manuscript main text
Synthetic	Quinolone Fatty acid related	O=C(C1=C2C=CC=C1)C=C(C=CCCCCCCCC)N2CC=C	12.37	—	—	—	—	—	—	—	—	—	—	—	1.237e-05	4.90763	6.4	24	-1.49237	0.280144	323.48	2	0	20.31	10	Not include in the manuscript main text
Synthetic	Quinolone Fatty acid related	O=C(C1=C2C=CC=C1)C=C(C=CCCCCCCC)N2CC#C	10.42	—	—	—	—	—	—	—	—	—	—	—	1.042e-05	4.98213	5.29	23	-0.307868	0.296762	307.44	2	0	20.31	8	Not include in the manuscript main text
Natural Product	Steroid-related	C[C@@H]([C@H]1CC[C@]2([H])[C@]1(C)CC[C@@]3([H])C2=C([H])C[C@]4([H])[C@]3(C)CC[C@H](N(C)C)C4)CC/C(C(C)C)=C\CN(C)C	—	—	—	—	—	—	—	—	—	—	67.21	—	6.721e-05	4.17257	7.51	35	-3.33743	0.163326	482.84	2	0	6.48	8
Natural Product	Steroid-related	C[C@@]12C(CCC2=O)C3CCC4=CC(OCCCCCCC[N+]5=CC=CC=C5)=CC=C4C3CC1.[Br-]	—	—	—	—	—	—	—	—	—	11.87	—	—	1.187e-05	4.92555	2.99	34	1.93555	0.198471	526.56	3	0	30.18	9
Natural Product	Terpene-related	C=C1C2CCC3C2C(C)(C)CCCC13C	—	—	—	—	—	—	—	—	> 630	—	—	—	0.00063	3.20066	4.06	15	-0.859341	0.292327	204.36	0	0	0	0
Natural Product	Terpene-related	CC1=CC(O)=C([C@]2(C)CC[C@H]3[C@]2(C)C3)C=C1Br	—	—	—	—	—	—	—	—	—	—	—	42.34	4.234e-05	4.37325	4.18	17	0.193249	0.352432	295.22	1	1	20.23	1
Natural Product	Terpene-related	C/C(C)=C/CC/C(C)=C/CC[C@@](C)(O)C=C	44.52	—	—	—	—	—	—	—	—	—	—	—	4.452e-05	4.35144	5.4	16	-1.04856	0.372592	222.37	1	1	20.23	7
Natural Product	Terpene-related	C=C1[C@@H](C)CC[C@@]2(C)C1CC=C(C=O)[C@]2(O)C=O	64.43	—	—	—	—	—	—	—	—	—	—	—	6.443e-05	4.19091	1.16	18	3.03091	0.318975	248.32	3	1	54.37	2
Natural Product	Terpene-related	OC(C=C1)=C(C(C)C)C2=C1[C@]3(C)[C@](CC2)([H])C(C)(C)CCC3	—	—	—	—	—	—	—	—	14	—	—	—	1.4e-05	4.85387	5.34	21	-0.486128	0.316657	286.46	1	1	20.23	1
Natural Product	Terpene-related	C[C@@]1(C(O)=O)CCC[C@]2(C)C1CCC3(CC4=C)C2CCC4C3	51.58	—	—	—	—	—	—	—	—	—	—	—	5.158e-05	4.28752	4.11	22	0.177519	0.266995	302.46	2	1	37.3	1
Natural Product	Terpene-related	CC1(C)CCC[C@@]2(C)[C@@]1([H])C[C@@H](O)C3=C[C@](C4CO4)(C)CC[C@@]32[H]	—	—	—	—	—	—	—	52.55	—	—	—	—	5.255e-05	4.27943	3.7	22	0.579427	0.266492	304.47	2	1	32.76	1
Natural Product	Terpene-related	C/C(C)=C\CC/C(C)=C/CNCCNC1[C@@H]2C[C@H](C[C@H]1C3)C[C@H]3C2	—	—	—	—	—	—	—	—	—	—	—	3.02	3.02e-06	5.51999	4.92	24	0.599993	0.3151	330.56	2	2	24.06	9
Natural Product	Terpene-related	O=C1OC2=CC=CC=C2C(O)=C1C/C=C(C)/CC/C=C(C)/CC/C=C(C)/C	5.46	—	—	—	—	—	—	—	—	—	—	—	5.46e-06	5.26281	7.62	27	-2.35719	0.267039	366.5	3	1	46.53	8
Natural Product	Terpene-related	C/C(C)=C\CC/C(C)=C/CC1=C(O)C=C2C(C=CC(O2)=O)=C1	6.7	—	—	—	—	—	—	—	—	—	—	—	6.7e-06	5.17393	5.35	22	-0.176075	0.322194	298.38	3	1	46.53	5
Natural Product	Terpene-related	O[C@H]1C[C@H](O)[C@@]2(C)C(CC[C@]3(C)C2CC=C4[C@@]3(C)CC[C@]5(C)[C@@]4(C)C[C@](C)(C(O)=O)CC5)C1(C)C	—	—	—	—	—	—	—	—	—	—	3.2	—	3.2e-06	5.49485	5.54	35	-0.04515	0.215084	486.73	4	3	77.76	1
Natural Product	Terpene-related	O[C@H]1C[C@H](O)[C@@]2(C)C(CC[C@]3(C)C2CC=C4[C@@]3(C)CC[C@]5(C)[C@@]4(C)C[C@](C)(C(O)=O)CC5)[C@@]1(CO[C@H]6[C@H]([C@@H]([C@H]([C@@H](C)O6)O)OC(C)=O)OC(C)=O)C	—	—	—	—	—	—	—	—	—	—	17.05	—	1.705e-05	4.76828	4.68	52	0.0882756	0.125626	732.95	11	4	169.05	8
Natural Product	Terpene-related	O[C@H]1C[C@H](O)[C@@]2(C)C(CC[C@]3(C)C2CC=C4[C@@]3(C)CC[C@]5(C)[C@@]4(C)C[C@](C)(C(O)=O)CC5)[C@@]1(CO[C@H]6[C@H]([C@@H]([C@H]([C@@H](C)O6)O)OC(C)=O)O)C	—	—	—	—	—	—	—	—	—	—	29.31	—	2.931e-05	4.53298	4.19	49	0.342984	0.126739	690.91	10	5	162.98	6
Natural Product	Terpene-related	O[C@H]1C[C@H](O)[C@@]2(C)C(CC[C@]3(C)C2CC=C4[C@@]3(C)CC[C@]5(C)[C@@]4(C)C[C@](C)(C(O[C@H]6[C@H]([C@@H]([C@H]([C@@H](C)O6)O)OC(C)=O)O)=O)CC5)[C@@]1(CO[C@H]7[C@H]([C@@H]([C@H]([C@@H](C)O7)O)OC(C)=O)OC(C)=O)C	—	—	—	—	—	—	—	—	—	—	27.93	—	2.793e-05	4.55393	4.25	65	0.303929	0.0959828	921.12	16	5	234.04	12
Natural Product	Phenolic compounds	C[C@H]1[C@@H](C)[C@H](C2=CC=C(OCO3)C3=C2)O[C@@H]1C4=CC(OCO5)=C5C=C4	59.64	—	—	—	—	—	—	—	—	—	—	—	5.964e-05	4.22446	4.34	25	-0.115538	0.231501	340.37	5	0	46.15	2
Natural Product	Phenolic compounds	C/C=C/C1=CC(OC)=C(O[C@@H](C2=CC=C(O)C(OC)=C2)[C@@H]3C)C3=C1	120	—	—	—	—	—	—	—	—	—	—	19.19	1.919e-05	4.71693	4.69	24	0.026925	0.269258	326.37	4	1	47.92	4
Natural Product	Phenolic compounds	C/C=C/C1=CC(OC)=C(O[C@@H](C2=CC=C(OCO3)C3=C2)[C@@H]4C)C4=C1	—	—	—	—	—	—	—	—	—	—	—	617.02	0.00061702	3.2097	5.21	24	-2.0003	0.18322	324.38	4	0	36.92	3	Not include in the manuscript main text
Natural Product	Phenolic compounds	C/C=C/C1=CC(OC)=C(OC(C2=CC=C(O)C(OC)=C2)=C3C)C3=C1	—	—	—	—	—	—	—	—	—	—	—	150	0.00015	3.82391	4.81	24	-0.986091	0.218281	324.38	4	1	51.83	4
Natural Product	Phenolic compounds	CC([C@H]1[C@H](O)C2=C(C(C3=CC=CC=C3C2=O)=O)O1)(O)C	—	—	—	—	—	—	—	—	—	45.58	—	—	4.558e-05	4.34123	0.72	20	3.62123	0.297374	274.27	5	2	83.83	1
Natural Product	Phenolic compounds	CC(C1=CC2=C(C(C3=CC=CC=C3C2=O)=O)O1)(O)C	—	—	—	—	—	—	—	—	—	48.78	—	—	4.878e-05	4.31176	2.55	19	1.76176	0.3109	256.26	4	1	67.51	1
Natural Product	Phenolic compounds	CC1=CC2=C(C(C=CC2=O)=O)C(O)=C1	—	—	—	—	—	—	—	—	—	—	120	—	0.00012	3.92082	1.44	14	2.48082	0.38368	188.18	3	1	54.37	0
Natural Product	Phenolic compounds	CC1(CCC2=C(C3=C(C(C2=O)=O)C=CC=C3)O1)C	—	—	—	—	—	—	—	—	—	—	—	130	0.00013	3.88606	2.48	18	1.40606	0.295772	242.27	3	0	43.37	0
Natural Product	Phenolic compounds	OC1=C(C(O)=C(C2=C3C(O)=CC(C)=C2)C4=C5C(C)=CC(O)=C4C3=O)C5=CC=C1C(C)=O	—	—	—	—	—	—	—	—	—	—	0.12	—	1.2e-07	6.92082	4.74	31	2.18082	0.305856	414.41	6	4	115.06	1
Natural Product	Phenolic compounds	CC1(C(C2C(C)=O)=O)C3=C(O)C(C)=C(O)C(C(C)=O)=C3OC1=CC2=O	—	—	—	—	150	—	—	—	—	—	—	—	0.00015	3.82391	0.91	25	2.91391	0.20955	344.32	7	2	117.97	2
Natural Product	Phenolic compounds	OC1=C(O)C=C(C(C(OC)=CC(OC)=C2)=C2C=C3)C3=C1	—	—	—	—	—	—	—	—	—	—	92.5	—	9.25e-05	4.03386	3.22	19	0.813858	0.290862	270.28	4	2	58.92	2
Natural Product	Phenolic compounds	C/C(C)=C\CC1=C(OCCCCN(CC)CC)C2=C(OC3=C(C(C/C=C(C)\C)=C(OC)C(OCCCCN(CC)CC)=C3)C2=O)C=C1OCCCCN(CC)CC	—	—	—	15.78	—	—	—	—	—	—	—	—	1.578e-05	4.80189	11.4	57	-6.59811	0.115414	792.15	9	0	72.94	29
Natural Product	Phenolic compounds	OC1=C(C(C=C(C)O2)=O)C2=C(CC=C(COC(C)=O)CO3)C3=C1	25.29	—	—	—	—	—	—	—	—	—	—	—	2.529e-05	4.59705	2.37	23	2.22705	0.273824	316.31	6	1	82.06	3
Natural Product	Phenolic compounds	O=C(C1=C(C([C@H]2[C@H](O)[C@@H](O)[C@H](O)[C@@H](CO)O2)=C(O)C=C1O)O3)C=C3C4=CC=C(O)C=C4	69.38	—	—	—	—	—	—	—	—	—	—	—	6.938e-05	4.15877	-0.078	31	4.23677	0.183791	432.38	10	7	177.14	3
Natural Product	Phenolic compounds	O=C(C=C(C1=CC=C(O)C(O)=C1)O2)C3=C2C=C(O)C=C3O	120	—	—	—	—	—	—	—	—	—	—	—	0.00012	3.92082	1.99	21	1.93082	0.255787	286.24	6	4	107.22	1
Natural Product	Peptide	O=C(N[C@@H](CC1CCCCC1)C(N[C@@H]([C@H](C)N(C)C(CN)=O)C(NC[C@H]2C[C@@H](O)[C@H](N3C(NC(C=C3)=O)=O)O2)=O)=O)N[C@@H](CC4=CNC5=C4C=CC=C5)C(NCC(C)(C)C)=O	—	—	—	—	—	—	—	—	—	—	—	1	1e-06	6	-0.31	61	6.31	0.134754	851.01	19	9	269.42	18
Natural Product	Peptide	O=C(N[C@@H](CC1=CC=C2C(C=CC=C2)=C1)C(N[C@@H]([C@H](C)N(C)C(CN)=O)C(NC[C@H]3C[C@@H](O)[C@H](N4C(NC(C=C4)=O)=O)O3)=O)=O)N[C@@H](CC5=CNC6=C5C=CC=C6)C(NCC(C)(C)C)=O	—	—	—	—	—	—	—	—	—	—	—	1 -- 2	1e-06	6	0.52	65	5.48	0.126462	895.03	19	9	269.42	18
Natural Product	Polyamide	O=C(NC1=CN(CCC(C)C)C(C(NC2=CC=C(C(NCCN3CCN(C)CC3)=O)N2C)=O)=C1)C4=CC(C=C(C(NC5=CN(CCC(C)C)C(C(NC6=CN(C)C(C(NCCN7CCN(C)CC7)=O)=C6)=O)=C5)=O)C=C8)=C8N4	—	—	—	—	—	—	—	—	9.5	—	—	—	9.5e-06	5.02228	3.53	77	1.49228	0.0893574	1056.33	21	7	223.07	22
Natural Product	Polyamide	O=C(NC1=CN(CCC(C)C)C(C(NC2=CC=C(C(NCCN(C)C)=O)N2C)=O)=C1)C3=CC(C=C(C(NC4=CN(CCC(C)C)C(C(NC5=CN(C)C(C(NCCN(C)C)=O)=C5)=O)=C4)=O)C=C6)=C6N3	—	—	—	—	—	—	—	—	5.2	—	—	—	5.2e-06	5.284	3.38	69	1.904	0.104914	946.17	19	7	216.59	22
Natural Product	Alkaloid	[H][C@@]1(CCCCCC/C=C\C=C/CC2)CN3CC[C@@]1([H])[C@@](CN2C4)([H])C=C4CCCC/C=C\C=C\CC3	—	—	54.02	—	—	—	—	—	—	—	—	—	5.402e-05	4.26745	8.93	34	-4.66255	0.171953	462.76	2	0	6.48	0
Natural Product	Alkaloid	C[N+]1=C2C3=CC=CC=C3[N-]C2=CC4=C1C=CC=C4.Cl	59.54	—	—	—	—	—	—	—	—	—	—	—	5.954e-05	4.22519	-2.45	20	6.67519	0.289426	268.75	2	0	3.88	0
Natural Product	Alkaloid	O=C1N(C2=C3C=CN=C2C=C1)C4=C3C=CC=C4[H]	—	—	—	—	—	—	—	—	—	—	72.65	—	7.625e-05	4.11776	2.76	17	1.35776	0.331843	220.31	3	0	34.89	0
Natural Product	Alkaloid	O=C1N(C2=C3C=CN=C2C=C1)C4=C3C=CC=C4O	—	—	—	—	—	—	—	—	—	—	67.73	—	6.773e-05	4.16922	2.42	18	1.74922	0.317324	236.23	4	1	55.12	0
Synthetic	Related to Comercial Drug	CN(CC[C@@]([C@@H](C1=C(OC)N=CC(C2=CC=C(Cl)C=C2)=C1)C3=CC=CC=C3)(O)C4=CC=CC5=CC=CC=C54)C	0.015	—	—	—	—	—	0.023	—	—	—	—	—	1.5e-08	7.82391	7.39	39	0.433909	0.27484	537.1	4	1	45.59	9
Synthetic	Related to Comercial Drug	COC(CC1)CCC1/N=C2C=C3N(C4=C(N=C3C=C\2NC5=CC=CN=C5OC)C=CC=C4)C6=CC=C(C=C6)OC(F)(F)F	—	—	—	—	—	—	—	—	—	—	—	1.17	1.17e-06	5.93181	5.81	43	0.121814	0.18899	589.62	8	1	80.57	8
Synthetic	Related to Comercial Drug	[H][C@@]12CC3=C(C=C(C(O)=C3C(C1=C([C@@]4(C(C(C(N)=O)=C([C@H]([C@@]4(C2)[H])N(C)C)O)=O)O)O)=O)NC([C@@H]5CCCN5C)=O)F	—	—	—	—	—	—	—	—	—	—	—	< 0.002 - 0.22	2e-09	8.69897	-1.19	40	9.88897	0.29794	558.56	12	6	193.73	4
Synthetic	Related to Comercial Drug	FC(F)(F)OC1=CC=C(OC2CCN(C3=CC=C(C4ON=C(C5=CC=C([N+]([O-])=O)O5)C4)C=C3)CC2)C=C1	12.08 - 24.16	—	—	—	—	—	—	—	—	—	—	—	1.208e-05	4.91793	5.77	37	-0.852067	0.182096	517.46	9	0	102.25	8
Synthetic	Related to Comercial Drug	FC1=CC(N2C[C@H](CNC(C)=O)OC2=O)=CC=C1N(CC3)CCN3C4=C(OC)N5C(N=C4)=NC=C5	—	—	—	—	—	—	—	—	—	—	—	2.07 - 33.09	2.07e-06	5.68403	0.61	35	5.07403	0.222489	483.5	11	1	104.54	6
Synthetic	Related to Comercial Drug	FC1=CC(N2C[C@H](CNC(C)=O)OC2=O)=CC=C1N(CC3)CCN3C4=NN5C(C=C4)=NC=C5	—	—	—	—	—	—	—	—	—	—	—	2.2 - 17.6	2.2e-06	5.65758	0.38	33	5.27758	0.234875	453.48	10	1	95.31	5
Synthetic	Related to Comercial Drug	FC1=CC(N2C[C@H](CNC(C)=O)OC2=O)=CC=C1C3=CC=C(C4=NN=NN4C)N=C3	—	—	—	—	—	—	—	—	—	—	—	< 0.61 - 77.78	6.1e-07	6.21467	1.04	30	5.17467	0.283803	411.34	10	1	115.13	5
Synthetic	Related to Comercial Drug	O=C1[C@@](C)(O/C=C/[C@@H]([C@H]([C@H]([C@@H]([C@@H]([C@H](C)[C@H]([C@H](/C=C/C=C(C2=O)/C)C)O)O)C)OC(NC3=CC=C(OC)C=C3)=O)C)OC)OC4=C(C)C(O)=C5C(C(C(N6CCOCC6)=C(N2)C5=O)=O)=C41	—	—	—	—	—	—	—	—	—	—	—	1.13	1.13e-06	5.94692	4.91	64	1.03692	0.127301	887.98	17	5	228.72	6
Synthetic	Related to Comercial Drug	O=C1[C@@](C)(O/C=C/[C@@H]([C@H]([C@H]([C@@H]([C@@H]([C@H](C)[C@H]([C@H](/C=C/C=C(C2=O)/C)C)O)O)C)OC(NC3=CC=C(N(C)C)C=C3)=O)C)OC)OC4=C(C)C(O)=C5C(C(C(N6CCOCC6)=C(N2)C5=O)=O)=C41	—	—	—	—	—	—	—	—	—	—	—	1.11	1.11e-06	5.95468	4.88	65	1.07468	0.125506	901.02	17	5	222.73	6
Synthetic	Related to Comercial Drug	O=C1[C@@](C)(O/C=C/[C@@H]([C@H]([C@H]([C@@H]([C@@H]([C@H](C)[C@H]([C@H](/C=C/C=C(C2=O)/C)C)O)O)C)OC(NCC3=CC(C4=C([H])C=CC=C4)=NO3)=O)C)OC)OC5=C(C)C(O)=C6C(C(C(N7CCOCC7)=C(N2)C6=O)=O)=C51	—	—	—	—	—	—	—	—	—	—	—	0.07	7e-08	7.1549	4.91	69	2.2449	0.142061	939.03	18	5	245.52	7
Synthetic	Related to Comercial Drug	O=C1[C@@](C)(O/C=C/[C@@H]([C@H]([C@H]([C@@H]([C@@H]([C@H](C)[C@H]([C@H](/C=C/C=C(C2=O)/C)C)O)O)C)OC(NCC3=CC(C4=C(OC)C=CC=C4)=NO3)=O)C)OC)OC5=C(C)C(O)=C6C(C(C(N7CCOCC7)=C(N2)C6=O)=O)=C51	—	—	—	—	—	—	—	—	—	—	—	0.26	2.6e-07	6.58503	4.84	70	1.74503	0.128878	969.05	19	5	254.75	8
Synthetic	Related to Comercial Drug	O=C1[C@@](C)(O/C=C/[C@@H]([C@H]([C@H]([C@@H]([C@@H]([C@H](C)[C@H]([C@H](/C=C/C=C(C2=O)/C)C)O)O)C)OC(NCC3=CC(C4=NC=CC=C4)=NO3)=O)C)OC)OC5=C(C)C(O)=C6C(C(C(N7CCOCC7)=C(N2)C6=O)=O)=C51	—	—	—	—	—	—	—	—	—	—	—	1.06	1.06e-06	5.97469	4	68	1.97469	0.120373	940.01	19	5	258.41	7
Synthetic	Related to Comercial Drug	O=C1[C@@](C)(O/C=C/[C@@H]([C@H]([C@H]([C@@H]([C@@H]([C@H](C)[C@H]([C@H](/C=C/C=C(C2=O)/C)C)O)O)C)OC(NCCCN(C(C)C)C(C)C)=O)C)OC)OC3=C(C)C(O)=C4C(C(C(N5CCOCC5)=C(N2)C4=O)=O)=C31	—	—	—	—	—	—	—	—	—	—	—	8.67	8.67e-06	5.06198	4.96	66	0.101981	0.105074	923.11	17	5	222.73	10
Synthetic	Related to Comercial Drug	O=C1[C@@](C)(O/C=C/[C@@H]([C@H]([C@H]([C@@H]([C@@H]([C@H](C)[C@H]([C@H](/C=C/C=C(C2=O)/C)C)O)O)C)OC(NC3CCN(CC4=CC=CC=C4)CC3)=O)C)OC)OC5=C(C)C(O)=C6C(C(C(N7CCOCC7)=C(N2)C6=O)=O)=C51	—	—	—	—	—	—	—	—	—	—	—	<0.03	3e-08	7.52288	5.2	69	2.32288	0.149367	955.11	17	5	222.73	7
Synthetic	Related to Comercial Drug	COC1=C(C(F)=CC2=C1N([C@@H]3C[C@@H]3F)C=C(C(O)=O)C2=O)N4CC(N)C5(CC5)C4	—	—	—	—	—	—	—	—	—	—	—	0.14 - 0.28	1.4e-07	6.85387	-1.39	29	8.24387	0.323786	405.4	7	2	96.1	4
Synthetic	Related to Comercial Drug	CC([C@@H]1CCN(C2=C(OC)C(N(C3CC3)C4=C(C(NS4)=O)C5=O)=C5C=C2F)C1)(N)C	—	—	—	—	—	—	—	—	—	—	—	0.14 - 0.28	1.4e-07	6.85387	1.96	30	4.89387	0.312993	432.52	7	2	113.2	4
Synthetic	Related to Comercial Drug	O=C1OC2=CC(OS(=O)(CC3=CC=C([N+]([O-])=O)C=C3)=O)=CC=C2C=C1COC(C4=CN(C5CC5)C(C=C(N6CC[NH2+]CC6)C(F)=C7)=C7C4=O)=O.[O-]C(C(F)(F)F)=O	—	—	—	—	—	—	—	—	—	—	39.09	—	3.909e-05	4.40793	2.52	67	1.88793	0.0901324	818.71	14	1	185.75	11
Synthetic	Related to Comercial Drug	FC1=CC2=C(N(C3CC3)C=C(C(O)=O)C2=O)N=C1N4CCC(N)C4	0.18	—	—	—	—	—	—	—	—	—	—	—	1.8e-07	6.74473	-1.94	24	8.68473	0.385012	332.33	7	2	99.76	3
Synthetic	Related to Comercial Drug	FC1=CC2=C(N(C3CC3)C=C(C(O)=O)C2=O)C(F)=C1N4CCC(N)C4	0.17	—	—	—	—	—	—	—	—	—	—	—	1.7e-07	6.76955	-1.37	25	8.13955	0.370971	349.34	6	2	86.87	3
Synthetic	Related to Comercial Drug	FC1=CC2=C(N(C3CC3)C=C(C(O)=O)C2=O)C(Cl)=C1N4CCC(N)C4	< 0.08	—	—	—	—	—	—	—	—	—	—	—	8e-08	7.09691	-0.87	25	7.96691	0.388911	368.79	6	2	86.87	3
Synthetic	Related to Comercial Drug	FC1=CC2=C(N(CC)C=C(C(O)=O)C2=O)N=C1N3CCC(N)C3	0.8	—	—	—	—	—	—	—	—	—	—	—	8e-07	6.09691	-2.07	23	8.16691	0.363164	320.32	7	2	99.76	3
Synthetic	Related to Comercial Drug	FC1=CC2=C(N(CC(C)C)C=C(C(O)=O)C2=O)N=C1N3CCC(N)C3	<0.09	—	—	—	—	—	—	—	—	—	—	—	9e-08	7.04576	-1.39	25	8.43576	0.386108	348.38	7	2	99.76	4
Synthetic	Related to Comercial Drug	FC1=CC2=C(N(C3=C(F)C=C(F)C=C3)C=C(C(O)=O)C2=O)N=C1N4CCC(N)C4	0.32	—	—	—	—	—	—	—	—	—	—	—	3.2e-07	6.49485	-0.45	29	6.94485	0.306826	404.35	7	2	99.76	3
Synthetic	Related to Comercial Drug	FC1=CC2=C(N(C3=C(F)C=C(F)C=C3)C=C(C(O)=O)C2=O)C(F)=C1N4CCC(N)C4	0.59	—	—	—	—	—	—	—	—	—	—	—	5.9e-07	6.22915	0.12	30	6.10915	0.284464	421.35	6	2	86.87	3
Synthetic	Related to Comercial Drug	BrC1=CC2=C(C=C1)N=C(C([C@H]([C@](C3=CC(OC)=NC(OC)=C3)(CCN(C)C)O)C4=CC=NC(OC)=C4OC)=C2)OC	—	—	—	—	—	—	—	—	—	—	0,0009*	—	9e-10	9.04576	4.75	41	4.29576	0.302261	627.54	10	1	445.19	12	*MIC50
Synthetic	Related to Comercial Drug	COC1=NC(OC)=C(C([C@@H]([C@@](O)(CCN(C)C)C2=CC(OC)=NC(OC)=C2)C3=CC4=C(N=C3OC)C=CC(Br)=C4)=C1)OC	—	—	—	—	—	—	—	—	—	—	0,0017*		1.7e-09	8.76955	5.03	43	3.73955	0.279402	657.56	11	1	467.45	11	*MIC50
Synthetic	Centered in five membered heterocycles	O[C@H]1[C@H]([C@H](O)CO)O[C@@H](SN(CCCCCCCCCC)CCCCCCCCCC)[C@@H]1O	—	—	—	—	—	—	—	—	—	—	< 10.17	—	1.017e-05	4.99268	6.27	33	-1.27732	0.207272	491.77	6	4	118.69	22
Synthetic	Centered in five membered heterocycles	N=C(N)N1C(C2=CC=CC=C2)CC(/C=C/C3=CC=CC=C3)=N1	—	—	—	—	—	—	—	—	—	—	0.54	—	5.4e-07	6.26761	2.76	22	3.50761	0.390301	290.37	4	2	65.47	3
Synthetic	Centered in five membered heterocycles	N=C(N)N1C(C2=C(C)C=CC=C2)CC(/C=C/C3=C(C)C=CC=C3)=N1	—	—	—	—	—	—	—	—	—	—	0.49	—	4.9e-07	6.3098	3.44	24	2.8698	0.360185	318.42	4	2	65.47	3
Synthetic	Centered in five membered heterocycles	N=C(N)N1C(C2=C(OC)C=CC=C2)CC(/C=C/C3=C(OC)C=CC=C3)=N1	—	—	—	—	—	—	—	—	—	—	0.59	—	5.9e-07	6.22915	2.62	26	3.60915	0.328228	350.42	6	2	83.93	5
Synthetic	Centered in five membered heterocycles	N=C(N)N1C(C2=CC(OC)=C(OC)C(OC)=C2)CC(/C=C/C3=CC(OC)=C(OC)C(OC)=C3)=N1	—	—	—	—	—	—	—	—	—	—	5.31	—	5.31e-06	5.27491	2.34	34	2.93491	0.212548	470.52	10	2	120.85	9
Synthetic	Centered in five membered heterocycles	N=C(N)N1C(C2=CC=C(Cl)C=C2)CC(/C=C/C3=CC=C(Cl)C=C3)=N1	—	—	—	—	—	—	—	—	—	—	0.43	—	4.3e-07	6.36653	3.97	24	2.39653	0.363423	359.26	4	2	65.47	3
Synthetic	Centered in five membered heterocycles	N=C(N)N1C(C2=CC=C(OC)C=C2)CC(/C=C/C3=CC=C(OC)C=C3)=N1	—	—	—	—	—	—	—	—	—	—	0.44	—	4.4e-07	6.35655	2.62	26	3.73655	0.334941	350.42	6	2	83.93	5
Synthetic	Centered in five membered heterocycles	COC(C=CC=C1)=C1C2CC(/C=C/C3=C(OC)C=CC=C3)=NN2C4=NC(C(F)(F)F)=CC(C5=CC=CC=C5)=N4	—	—	—	—	—	—	—	—	—	—	20.94	—	2.094e-05	4.67902	6.99	39	-2.31098	0.164366	530.55	6	0	59.84	8	Not include in the manuscript main text
Synthetic	Centered in five membered heterocycles	COC1=CC(/C=C/C2=NN(C3=NC(C(F)(F)F)=CC(C4=CC=CC=C4)=N3)C(C5=CC(OC)=C(OC)C(OC)=C5)C2)=CC(OC)=C1OC	—	—	—	—	—	—	—	—	—	—	> 16.76	—	1.676e-05	4.77573	6.71	47	-1.93427	0.139207	650.65	10	0	96.76	12	Not include in the manuscript main text
Synthetic	Centered in five membered heterocycles	ClC(C=C1)=CC=C1/C=C/C2=NN(C3=NC(C(F)(F)F)=CC(C4=CC=CC=C4)=N3)C(C5=CC=C(Cl)C=C5)C2	—	—	—	—	—	—	—	—	—	—	> 20.60	—	2.06e-05	4.68613	8.34	37	-3.65387	0.173514	539.39	4	0	41.38	6	Not include in the manuscript main text
Synthetic	Centered in five membered heterocycles	C[N+](C=C1)=CC=C1/C2=C3C=C/C(N\3)=C(C4=CC=[N+](C)C=C4)/C(C=C/5)=NC5=C(C6=CC=[N+](C)C=C6)/C7=CC=C(/C(C8=CC=[N+](C)C=C8)=C9C=CC2=N/9)N7	50	—	—	—	—	—	—	—	—	—	—	—	5e-05	4.30103	-13.88	52	18.181	0.113316	678.84	8	2	68.06	4
Synthetic	Centered in five membered heterocycles	O=S(C(C=C1)=CC=C1/C2=C3C=C/C(N\3)=C(C4=CC=C(S(=O)([O-])=O)C=C4)/C(C=C/5)=NC5=C(C6=CC=C(S(=O)([O-])=O)C=C6)/C7=CC=C(/C(C8=CC=C(S(=O)([O-])=O)C=C8)=C9C=CC2=N/9)N7)([O-])=O	100	—	—	—	—	—	—	—	—	—	—	—	0.0001	4	-8.09	64	12.09	0.085625	930.97	16	2	314.86	8
Synthetic	Centered in five membered heterocycles	CC1=C(CC2=CC=C(N3CCNCC3)C(OC)=C2[H])C=C(C4=CC=C(Cl)C=C4)N1C5=CC=C(Cl)C=C5	—	—	—	—	—	—	—	—	—	—	—	15.84 - 31.67	1.584e-05	4.80024	6.48	35	-1.67976	0.187895	506.47	4	1	29.43	6
Synthetic	Centered in five membered heterocycles	CC1=C(CC2=CC=C(N3CCNCC3)C([H])=C2C(F)(F)F)C=C(C4=CC=C(Cl)C=C4)N1C5=CC=C(Cl)C=C5	—	—	—	—	—	—	—	—	—	—	—	7.35 - 14.7	7.35e-06	5.13371	7.39	37	-2.25629	0.190086	544.44	3	1	20.2	6
Synthetic	Centered in five membered heterocycles	CC1=C(CC2=NC=C(N3CCNCC3)C=C2)C=C(C4=CC=C(Cl)C=C4)N1C5=CC=C(Cl)C=C5	—	—	—	—	—	—	—	—	—	—	—	16.8 - 33.6	1.68e-05	4.77469	5.6	33	-0.825309	0.198222	477.44	4	1	33.09	5
Synthetic	Centered in five membered heterocycles	ClC1=CN(C=N1)C2=CC=C(NC(C3=CC=C(C(F)(F)F)C=C3)=O)C=C2OC	—	3.16	—	—	—	—	—	—	—	—	—	—	3.16e-06	5.50031	3.91	27	1.59031	0.27909	395.77	5	1	56.15	5
Synthetic	Centered in five membered heterocycles	ClC1=CN(C=N1)C2=CC=C(NC(C3=CC=CC([N+]([O-])=O)=C3Cl)=O)C=C2OC	—	3.07	—	—	—	—	—	—	—	—	—	—	3.07e-06	5.51286	2.75	27	2.76286	0.279727	407.21	8	1	101.97	5
Synthetic	Centered in five membered heterocycles	ClC1=CN(C=N1)C2=CC=C(NC(C3=CC=C([N+]([O-])=O)C=C3)=O)C=C2OC	—	3.35	—	—	—	—	—	—	—	—	—	—	3.35e-06	5.47496	2.14	26	3.33496	0.288488	372.77	8	1	101.97	5
Synthetic	Centered in five membered heterocycles	ClC1=CN(C=N1)C2=CC=C(NC(C3=CC=CS3)=O)C=C2OC	—	7.49	—	—	—	—	—	—	—	—	—	—	7.49e-06	5.12552	2.93	22	2.19552	0.31918	333.8	5	1	84.39	4
Synthetic	Centered in five membered heterocycles	ClC1=CN(C=N1)C2=CC=C(NS(C3=CC=CS3)(=O)=O)C=C2OC	—	3.38	—	—	—	—	—	—	—	—	—	—	3.38e-06	5.47108	2.2	23	3.27108	0.325886	369.85	6	1	109.84	4
Synthetic	Centered in five membered heterocycles	ClC1=CN(C=N1)C2=CC=C(NS(C3=CC=CC=C3OC)(=O)=O)C=C2OC	—	3.17	—	—	—	—	—	—	—	—	—	—	3.17e-06	5.49894	2.14	26	3.35894	0.289752	393.85	7	1	90.83	5
Synthetic	Centered in five membered heterocycles	ClC1=CN(C=N1)C2=CC=C(NS(C3=CC=C(OC)C(OC)=C3)(=O)=O)C=C2OC	—	2.95	—	—	—	—	—	—	—	—	—	—	2.95e-06	5.53018	2.07	28	3.46018	0.270584	423.88	8	1	100.06	6
Synthetic	Centered in five membered heterocycles	ClC1=CN(C=N1)C2=CC=C(NS(C3=CC=C([N+]([O-])=O)C=C3)(=O)=O)C=C2OC	—	3.06	—	—	—	—	—	—	—	—	—	—	3.06e-06	5.51428	1.29	27	4.22428	0.279799	408.82	9	1	127.42	5
Synthetic	Centered in five membered heterocycles	O=C(C1=C(N)ON=C1C)N/N=C/C2=CC=NC=C2	—	—	—	—	—	140	—	—	—	—	—	—	0.00014	3.85387	0.68	18	3.17387	0.293322	245.24	7	2	106.4	3
Synthetic	Centered in five membered heterocycles	O=C(C1=C(N)ON=C1C)N/N=C/C2=CC=C(C(F)(F)F)C=C2	—	—	—	—	—	210	—	—	—	—	—	—	0.00021	3.67778	2.53	22	1.14778	0.229025	312.25	6	2	93.51	4
Synthetic	Centered in five membered heterocycles	O=C(C1=C(N)ON=C1C)N/N=C/C2=CC=C([N+]([O-])=O)C=C2	—	—	—	—	—	51.1	—	—	—	—	—	—	5.11e-05	4.29158	0.76	21	3.53158	0.279974	289.25	9	2	139.33	4
Synthetic	Centered in five membered heterocycles	O=C(C1=C(N)ON=C1C)N/N=C/C2=CC=C(Cl)C(Cl)=C2	—	—	—	—	—	210	—	—	—	—	—	—	0.00021	3.67778	2.89	20	0.787781	0.251928	313.14	6	2	93.51	3
Synthetic	Centered in five membered heterocycles	O=C(C1=C(N)ON=C1C)N/N=C/C2=CC=C(Cl)C=C2Cl	—	—	—	—	—	55.3	—	—	—	—	—	—	5.53e-05	4.25727	2.89	20	1.36727	0.291623	313.14	6	2	93.51	3
Synthetic	Centered in five membered heterocycles	COC1=CC(C(C2=CC=C(OCCN3CCCCC3)C=C2)C4=CC=CS4)=CC=C1	7.67	—	—	—	—	—	—	—	—	—	—	—	7.67e-06	5.1152	4.92	29	0.195205	0.241649	407.58	3	0	49.94	8
Synthetic	Centered in five membered heterocycles	FC1=CC=C(C(C2=CC=C(OCCN3CCCCC3)C=C2)C4=CC=CS4)C=C1	7.9	—	—	—	—	—	—	—	—	—	—	—	7.9e-06	5.10237	5.09	28	0.0123729	0.249652	395.54	2	0	40.71	7
Synthetic	Centered in five membered heterocycles	ClC1=CC=C(C(C2=CC=C(OCCN3CCCCC3)C=C2)C4=CC=CS4)C=C1	3.79	—	—	—	—	—	—	—	—	—	—	—	3.79e-06	5.42136	5.59	28	-0.168639	0.265259	411.99	2	0	40.71	7
Synthetic	Centered in five membered heterocycles	COC1=CC=C(C(C2=CC=C(OCCN3CCCCC3)C=C2)C4=CC=CS4)C=C1	7.67	—	—	—	—	—	—	—	—	—	—	—	7.67e-06	5.1152	4.92	29	0.195205	0.241649	407.58	3	0	49.94	8
Synthetic	Centered in five membered heterocycles	CCN(CC)CCOC(C=C1)=CC=C1C(C2=CC=CS2)C3=CC=C(F)C=C3	16.3	—	—	—	—	—	—	—	—	—	—	—	1.63e-05	4.78781	4.77	27	0.0178124	0.242937	383.53	2	0	40.71	9
Synthetic	Centered in five membered heterocycles	CC(C)N(C(C)C)CCOC(C=C1)=CC=C1C(C2=CC=CS2)C3=CC=C(F)C=C3	15.2	—	—	—	—	—	—	—	—	—	—	—	1.52e-05	4.81816	5.49	29	-0.671844	0.227616	411.58	2	0	40.71	9
Synthetic	Centered in five membered heterocycles	CC(C)N(C(C)C)CCOC(C=C1)=CC=C1C(C2=CC=CS2)C3=CC=C(Cl)C=C3	29.26	—	—	—	—	—	—	—	—	—	—	—	2.926e-05	4.53373	5.99	29	-1.45627	0.214179	428.03	2	0	40.71	9
Synthetic	Centered in five membered heterocycles	FC1=CC=C(C(C2=CC=C(OCCN3CCCC3)C=C2)C4=CC=CS4)C=C1	8.2	—	—	—	—	—	—	—	—	—	—	—	8.2e-06	5.08619	4.74	27	0.346186	0.258077	381.51	2	0	40.71	7
Synthetic	Centered in five membered heterocycles	FC1=CC=C(C(C2=CC=C(OCCN3CCCCCCC3)C=C2)C4=CC=CS4)C=C1	3.81	—	—	—	—	—	—	—	—	—	—	—	3.81e-06	5.41908	6.06	30	-0.640925	0.247471	423.59	2	0	40.71	7
Synthetic	Centered in five membered heterocycles	[H]C(C=C1)=CC=C1C2=CC(C3C(C4=CC=C[CH-]4)C2)=NNC3=O.[CH-]5C=CC=C5.[Fe+2]	63.5	—	—	—	—	—	—	—	—	—	—	—	6.35e-05	4.19723	2.68	27	1.51723	0.21297	396.27	3	1	209.46	2
Synthetic	Centered in five membered heterocycles	BrC(C=C1)=CC=C1C2=CC(C3C(C4=CC=C[CH-]4)C2)=NNC3=O.[CH-]5C=CC=C5.[Fe+2]	8.22	—	—	—	—	—	—	—	—	—	—	—	8.22e-06	5.08513	3.4	28	1.68513	0.248808	475.17	3	1	228.09	2
Synthetic	Centered in five membered heterocycles	O=C1C2C(C3=CC=C[CH-]3)CC(C4=CC=C(OC)C=C4)=CC2=NN1.[CH-]5C=CC=C5.[Fe+2]	35.8	—	—	—	—	—	—	—	—	—	—	—	3.58e-05	4.44612	2.61	29	1.83612	0.210041	426.3	4	1	231.72	3
Synthetic	Miscellaneous Synthetic compounds	O=C1C=CC2=C3N1C[C@H](N3C(C=N2)=O)CN4CCC(NCC5=CC6=C(C=N5)OCCC6)CC4	4.46	—	—	—	—	—	—	—	—	—	—	—	4.46e-06	5.35067	0.42	33	4.93067	0.222134	448.53	9	1	90.37	5
Synthetic	Miscellaneous Synthetic compounds	C12=CC=CC=C1C3=CC=CC=C3[I+]2.[Cl-]	0.4	—	—	—	—	—	—	—	—	—	—	—	4e-07	6.39794	3.32	14	3.07794	0.626084	314.55	0	0	0	0
Synthetic	Miscellaneous Synthetic compounds	O=C1C2=CC(C(F)(F)F)=CC([N+]([O-])=O)=C2SC(N3CCN(CC4CCCCC4)CC3)=N1	0.022	—	—	—	—	—	—	—	—	—	—	—	2.2e-08	7.65758	2.51	31	5.14758	0.338416	456.49	7	0	107.03	4
Synthetic	Miscellaneous Synthetic compounds	OC1=CC(OC)=CC(/C=C/C2=CC(C=CC=C3)=C3S2)=C1	—	—	—	—	—	—	—	—	—	—	56.67	—	5.667e-05	4.24665	4.37	20	-0.123353	0.290895	282.36	2	1	57.7	3
Synthetic	Miscellaneous Synthetic compounds	NC(C=C1)=CC=C1C2=NC(C=C3)=C(N2)C=C3C4=CC=C(N=C(C5=CC=C(N)C=C5)N6)C6=C4	—	—	—	—	—	—	—	—	—	—	19.21	—	1.921e-05	4.71647	4.45	32	0.266473	0.201924	416.49	6	4	109.4	3
Synthetic	Miscellaneous Synthetic compounds	O=C(/C=C/C(OCC)=O)C1=CC=C(C(C)(C)C)C=C1	—	—	—	—	—	—	—	—	—	—	15.37	—	1.517e-05	4.81901	3.33	19	1.48901	0.347476	260.33	3	0	43.37	6
Synthetic	Miscellaneous Synthetic compounds	O=C(/C=C/C(OCC)=O)C1=CC(C=CC=C2)=C2S1	—	—	—	—	—	—	—	—	—	—	61.46	—	6.146e-05	4.21141	2.67	18	1.54141	0.320535	260.31	3	0	71.61	5
Synthetic	Miscellaneous Synthetic compounds	O=C(/C=C\C(OCC)=O)C1=CC=C(C(C)(C)C)C=C1	—	—	—	—	—	—	—	—	—	—	30.73	—	3.073e-05	4.51244	3.33	19	1.18244	0.32537	260.33	3	0	43.37	6
Synthetic	Miscellaneous Synthetic compounds	O=C1C2=CC=CC=C2N(C)C1=S	—	—	—	—	—	—	—	—	—	—	63	—	6.3e-05	4.20066	0.79	12	3.41066	0.479575	177.23	2	0	52.4	0
Synthetic	Miscellaneous Synthetic compounds	O=C1C2=CC=CC=C2N(CCCC)C1=S	—	—	—	—	—	—	—	—	—	—	32	—	3.2e-05	4.49485	2.11	15	2.38485	0.41053	219.31	2	0	52.4	3
Synthetic	Miscellaneous Synthetic compounds	O=C1C2=CC=CC=C2N(C3=CC=CC=C3)C1=S	—	—	—	—	—	—	—	—	—	—	63	—	6.3e-05	4.20066	2.61	17	1.59066	0.338524	239.29	2	0	52.4	1
Synthetic	Miscellaneous Synthetic compounds	O=NCCCCCCCCN=C=S	—	—	—	—	—	—	—	—	—	—	—	19.97	1.997e-05	4.69962	3.53	13	1.16962	0.495268	200.31	3	0	73.88	9
Synthetic	Miscellaneous Synthetic compounds	OCCCCCCCCN=C=S	—	—	—	—	—	—	—	—	—	—	21.36	—	2.136e-05	4.6704	3.8	12	0.870399	0.533204	187.31	2	1	64.68	8
Synthetic	Miscellaneous Synthetic compounds	CC1(C)CCC(CC2=CC(O)=C(C3=CC=CC=C3)C(N2)=O)CC1	0.13 - 0.99	—	—	—	—	—	—	—	—	—	—	0.51 - 0.99	1.3e-07	6.88606	3.46	23	3.42606	0.410169	311.42	3	2	49.33	3
Synthetic	Miscellaneous Synthetic compounds	O=C(N[C@H](C1=CC=CC=C1)C)C2=CC([N+]([O-])=O)=CC([N+]([O-])=O)=C2	—	—	—	—	—	—	—	—	—	39.67	—	—	3.967e-05	4.40154	0.96	23	3.44154	0.262179	315.28	8	1	120.74	5
Synthetic	Miscellaneous Synthetic compounds	O=C(N[C@@H](C1=CC=CC=C1)C)C2=CC([N+]([O-])=O)=CC([N+]([O-])=O)=C2	—	—	—	—	—	—	—	—	—	1.27	—	—	1.27e-06	5.8962	0.96	23	4.9362	0.351208	315.28	8	1	120.74	5
Synthetic	Miscellaneous Synthetic compounds	O=C(O[C@@H](C1=CC=CC=C1)C)C2=CC([N+]([O-])=O)=CC([N+]([O-])=O)=C2	—	—	—	—	—	—	—	—	—	4.94	—	—	4.94e-06	5.30627	14.32	23	-9.01373	0.316069	316.27	8	0	117.94	6
Synthetic	Miscellaneous Synthetic compounds	O=C(O[C@H](C1=CC=CC=C1)C)C2=CC([N+]([O-])=O)=CC([N+]([O-])=O)=C2	—	—	—	—	—	—	—	—	—	> 10310	—	—	0.0103	1.98716	14.34	23	-12.3528	0.118366	316.27	8	0	117.94	6
Synthetic	Miscellaneous Synthetic compounds	S=C(N1CCCC1)SC2=C(C(N)=O)C=C([N+]([O-])=O)C([H])=C2[N+]([O-])=O	—	—	—	—	—	—	—	—	—	17.54	—	—	1.754e-05	4.75597	0.33	23	4.42597	0.28329	256.38	9	1	195.36	5
Synthetic	Miscellaneous Synthetic compounds	S=C(N1CCCC1)SC2=C(C(N)=O)C=C([N+]([O-])=O)C([H])=C2[N+]([O-])=O	—	—	—	—	—	—	—	—	—	5.19	—	—	5.19e-06	5.28483	0.33	19	4.95483	0.381064	356.38	9	1	195.36	5
Synthetic	Miscellaneous Synthetic compounds	S=C(N1CCCC1)SC2=NC=NC(N(C)C)=C2[N+]([O-])=O	—	—	—	—	—	—	—	—	—	4.98	—	—	4.98e-06	5.30277	0.95	20	4.35277	0.36324	313.41	7	0	135.47	4
Synthetic	Miscellaneous Synthetic compounds	S=C(N(CC)CC)SC1=NC=C([N+]([O-])=O)C=C1C#N	—	—	—	—	—	—	—	—	—	1.35	—	—	1.35e-06	5.86967	1.12	19	4.74967	0.423234	296.37	6	0	143.13	5
Synthetic	Miscellaneous Synthetic compounds	S=C(N(CCCCC)CCCCC)SC1=NC=C([N+]([O-])=O)C=C1C#N	—	—	—	—	—	—	—	—	—	5.3	—	—	5.3e-06	5.27572	3.85	25	1.42572	0.28911	380.54	6	0	143.13	11
Synthetic	Miscellaneous Synthetic compounds	S=C(N(CCCCCC)CCCCCC)SC1=NC=C([N+]([O-])=O)C=C1C#N	—	—	—	—	—	—	—	—	—	5.05	—	—	5.05e-06	5.29671	4.46	27	0.836709	0.268759	480.59	6	0	143.13	13
Synthetic	Miscellaneous Synthetic compounds	S=C(N(CCCCCCC)CCCCCCC)SC1=NC=C([N+]([O-])=O)C=C1C#N	—	—	—	—	—	—	—	—	—	2.48	—	—	2.48e-06	5.60555	5.67	29	-0.0644517	0.264814	436.64	6	0	143.13	15
Synthetic	Miscellaneous Synthetic compounds	CC(C=C1N2C=C(CNC(C)=O)N=N2)=NC3=C1C=C(OC)C=C3	—	32.12	—	—	—	—	—	—	—	—	—	—	3.212e-05	4.49322	0.59	23	3.90322	0.26764	311.34	7	1	81.93	4
Synthetic	Miscellaneous Synthetic compounds	CC(C=C1N2C=C(CNC(C3=CC=C(OC)C=C3)=O)N=N2)=NC4=C1C=C(OC)C=C4	—	24.79	—	—	—	—	—	—	—	—	—	—	2.479e-05	4.60572	1.96	30	2.64572	0.210328	403.44	8	1	91.16	6
Synthetic	Miscellaneous Synthetic compounds	CC(C=C1N2C=C(CNC(C3=CC=C(C(F)(F)F)C=C3)=O)N=N2)=NC4=C1C=C(OC)C=C4	—	11.33	—	—	—	—	—	—	—	—	—	—	1.133e-05	4.94577	2.88	32	2.06577	0.211741	441.41	7	1	81.93	6
Synthetic	Miscellaneous Synthetic compounds	CC(C=C1N2C=C(CNS(C3=CC=CC=C3C(F)(F)F)(=O)=O)N=N2)=NC4=C1C=C(OC)C=C4	—	20.94	—	—	—	—	—	—	—	—	—	—	2.094e-05	4.67902	2.56	33	2.11902	0.19425	477.47	8	1	107.38	6
Synthetic	Miscellaneous Synthetic compounds	CC(C=C1N2C=C(CNS(C3=CC=C(OC)C=C3)(=O)=O)N=N2)=NC4=C1C=C(OC)C=C4	—	22.75	—	—	—	—	—	—	—	—	—	—	2.275e-05	4.64302	1.65	31	2.99302	0.205191	439.49	9	1	116.61	6
Synthetic	Miscellaneous Synthetic compounds	CC(C=C1N2C=C(CN3CCN(C(C4=CC=C(F)C=C4)=O)CC3)N=N2)=NC5=C1C=C(OC)C=C5	—	21.72	—	—	—	—	—	—	—	—	—	—	2.172e-05	4.66314	2.47	34	2.19314	0.187897	460.51	8	0	76.38	5
Synthetic	Miscellaneous Synthetic compounds	CC(C=C1N2C=C(CN3CCN(C(C4=CC=C(OC)C=C4)=O)CC3)N=N2)=NC5=C1C=C(OC)C=C5	—	21.16	—	—	—	—	—	—	—	—	—	—	2.116e-05	4.67448	2.3	35	2.37448	0.182973	472.55	9	0	85.61	6
Synthetic	Miscellaneous Synthetic compounds	O=C(N/N=C/C1=CC=CC(OC(F)(F)C(F)F)=C1)C2=C(N[C@H](CC(N(C)C)=O)CSC3=CC=CC=C3)C4=C(N=C2)C=CC(F)=C4	—	1.93	—	—	—	—	—	—	—	—	—	—	1.93e-06	5.71444	5.9	45	-0.185557	0.173973	645.65	8	2	121.22	13
Synthetic	Miscellaneous Synthetic compounds	O=C(N/N=C/C1=CC=CC(OC(F)(F)C(F)F)=C1)C2=C(N[C@H](CC(N(C)C)=O)CSC3=CC=CC=C3)C4=C(N=C2)C(C(F)(F)F)=CC=C4	—	3.59	—	—	—	—	—	—	—	—	—	—	3.59e-06	5.44491	6.65	48	-1.20509	0.155407	695.66	8	2	121.22	14
Synthetic	Miscellaneous Synthetic compounds	O=C(N/N=C/C1=CC=CN=C1)C2=C(N[C@H](CC(N(C)C)=O)CSC3=CC=CC=C3)C4=C(N=C2)C(C(F)(F)F)=CC=C4	—	2.15	—	—	—	—	—	—	—	—	—	—	2.15e-06	5.66756	4.83	41	0.837562	0.189379	580.63	8	2	124.88	11
Synthetic	Miscellaneous Synthetic compounds	O=C(N/N=C/C1=CC=CN=C1)C2=C(N[C@H](CC(N(C)C)=O)CSC3=CC=CC=C3)C4=C(N=C2)C=CC(F)=C4	—	18.85	—	—	—	—	—	—	—	—	—	—	1.885e-05	4.72469	4.09	38	0.634689	0.170337	530.53	8	2	124.88	10
Synthetic	Miscellaneous Synthetic compounds	O=C(N/N=C/C1=CC=C(F)C=C1)C2=C(N[C@H](CC(N(C)C)=O)CSC3=CC=CC=C3)C4=C(N=C2)C=CC(F)=C4	—	9.13	—	—	—	—	—	—	—	—	—	—	9.13e-06	5.03953	5.19	39	-0.150471	0.17703	547.63	7	2	111.99	10
Synthetic	Miscellaneous Synthetic compounds	O=C(N/N=C/C1=CC=C(F)C=C1)C2=C(N[C@H](CC(N(C)C)=O)CSC3=CC=CC=C3)C4=C(N=C2)C(C(F)(F)F)=CC=C4	—	16.76	—	—	—	—	—	—	—	—	—	—	1.676e-05	4.77573	5.93	42	-1.15427	0.15578	597.64	7	2	111.99	11
Synthetic	Miscellaneous Synthetic compounds	O=C(N/N=C/C1=CC=C(OC(F)(F)F)C=C1)C2=C(N[C@H](CC(N(C)C)=O)CSC3=CC=CC=C3)C4=C(N=C2)C(C(F)(F)F)=CC=C4	—	7.53	—	—	—	—	—	—	—	—	—	—	7.53e-06	5.12321	6.93	46	-1.80679	0.152582	663.64	8	2	121.22	13
Synthetic	Miscellaneous Synthetic compounds	O=C(N/N=C/C1=CC=C(OC(F)(F)F)C=C1)C2=C(N[C@H](CC(N(C)C)=O)CSC3=CC=CC=C3)C4=C(N=C2)C=CC(F)=C4	—	8.15	—	—	—	—	—	—	—	—	—	—	8.15e-06	5.08884	6.18	43	-1.09116	0.162133	613.63	8	2	121.22	12
Synthetic	Miscellaneous Synthetic compounds	O=C(N/N=C/C1=CC=C(OC)C(O)=C1)C2=C(N[C@H](CC(N(C)C)=O)CSC3=CC=CC=C3)C4=C(N=C2)C=CC(F)=C4	—	8.68	—	—	—	—	—	—	—	—	—	—	8.68e-06	5.06148	4.67	41	0.39148	0.169128	575.66	9	3	141.45	11
Synthetic	Miscellaneous Synthetic compounds	O=C(N/N=C/C1=CC=C(OC)C(O)=C1)C2=C(N[C@H](CC(N(C)C)=O)CSC3=CC=CC=C3)C4=C(N=C2)C(C(F)(F)F)=CC=C4	—	15.98	—	—	—	—	—	—	—	—	—	—	1.598e-05	4.79642	5.42	44	-0.623577	0.149343	625.67	9	3	141.45	12
Synthetic	Miscellaneous Synthetic compounds	O=C(N/N=C/CCCCCCCC)C1=C(N[C@H](CC(N(C)C)=O)CSC2=CC=CC=C2)C3=C(N=C1)C(C(F)(F)F)=CC=C3	—	8.12	—	—	—	—	—	—	—	—	—	—	8.12e-06	5.09044	7.26	43	-2.16956	0.162184	615.46	7	2	111.99	17
Synthetic	Miscellaneous Synthetic compounds	O=C(N/N=C/CCCCCCCC)C1=C(N[C@H](CC(N(C)C)=O)CSC2=CC=CC=C2)C3=C(N=C1)C=CC(F)=C3	—	8.84	—	—	—	—	—	—	—	—	—	—	8.84e-06	5.05355	6.51	40	-1.45645	0.173084	565.76	7	2	111.99	16
Synthetic	Miscellaneous Synthetic compounds	[O-][N+]1=C(C(N)=O)C(C)=[N+]([O-])C2=CC=C([H])C=C21	—	—	—	—	—	—	—	—	—	—	17.79	—	1.779e-05	4.74982	-0.31	16	5.05982	0.406704	219.2	6	1	94.01	1
Synthetic	Miscellaneous Synthetic compounds	[O-][N+]1=C(C(OC)=O)C(C)=[N+]([O-])C2=CC=C(C(OC)=O)C=C21	—	—	—	—	—	—	—	—	—	—	—	8.55	8.55e-06	5.06803	0.42	21	4.64803	0.330629	292.25	8	0	103.52	4
Synthetic	Miscellaneous Synthetic compounds	[O-][N+]1=C(C(C)=O)C(C(F)(F)F)=[N+]([O-])C2=CC=C(C(OCC)=O)C=C21	—	—	—	—	—	—	—	—	—	—	—	> 27.8	2.78e-05	4.55596	1.29	24	3.26596	0.260069	344.25	7	0	94.29	5
Synthetic	Miscellaneous Synthetic compounds	[O-][N+]1=C(C(OC)=O)C(C)=[N+]([O-])C2=CC=C(C(OCCC)=O)C=C21	—	—	—	—	—	—	—	—	—	—	—	> 31.2	3.12e-05	4.50585	1.28	23	3.22585	0.268392	320.3	8	0	103.52	6
Synthetic	Miscellaneous Synthetic compounds	[O-][N+]1=C(C(C2=CC=CS2)=O)C(C(F)(F)F)=[N+]([O-])C3=CC=C(C(OCC)=O)C=C31	—	—	—	—	—	—	—	—	—	—	—	6.06	6.06e-06	5.21753	2.42	28	2.79753	0.255286	412.34	7	0	122.53	6
Synthetic	Miscellaneous Synthetic compounds	[O-][N+]1=C(C(C2=CC=CS2)=O)C(C(F)(F)F)=[N+]([O-])C3=CC=C(C(OC(C)C)=O)C=C31	—	—	—	—	—	—	—	—	—	—	—	> 23.5	2.35e-05	4.62893	2.78	29	1.84893	0.218677	426.37	7	0	122.53	6
Synthetic	Miscellaneous Synthetic compounds	[O-][N+]1=C(C(C2=CC=CS2)=O)C(C(F)(F)F)=[N+]([O-])C3=CC=C(C(OCCC)=O)C=C31	—	—	—	—	—	—	—	—	—	—	—	> 23.5	2.35e-05	4.62893	2.87	29	1.75893	0.218677	426.37	7	0	122.53	7
Synthetic	Miscellaneous Synthetic compounds	[O-][N+]1=C(C(C2=CC=CC=C2)=O)C(C(F)(F)F)=[N+]([O-])C3=CC=C(C(OC)=O)C=C31	—	—	—	—	—	—	—	—	—	—	—	> 25.5	2.55e-05	4.59346	2.15	28	2.44346	0.224751	392.29	7	0	94.29	5
Synthetic	Miscellaneous Synthetic compounds	[O-][N+]1=C(C(OC(C)C)=O)C(C(F)(F)F)=[N+]([O-])C2=CC=C(C(OC(C)C)=O)C=C21	—	—	—	—	—	—	—	—	—	—	—	6.47	6.47e-06	5.1891	2.46	28	2.7291	0.253895	402.32	8	0	103.52	7
Synthetic	Miscellaneous Synthetic compounds	O=C(NCC1=CC=C(F)C=C1)C2=CC(C3=CC=CC=C3)N4C(NC=N4)=N2	—	22.86	—	—	—	—	—	—	—	—	—	—	2.286e-05	4.64092	1.83	26	2.81092	0.244541	349.37	6	2	262.04	4	Not include in the manuscript main text
Synthetic	Miscellaneous Synthetic compounds	O=C(NCC#C)C1=CC(C2=CC=CC=C2)N3C(NC=N3)=N1	—	35.8	—	—	—	—	—	—	—	—	—	—	3.508e-05	4.45494	0.34	21	4.11494	0.290632	279.3	6	2	219.74	3	Not include in the manuscript main text
Synthetic	Miscellaneous Synthetic compounds	O=C(NC1=CC=C(Cl)C=C1)C2=CC(C3=CC=C(OC)C=C3)N4C(NC=N4)=N2	—	26.19	—	—	—	—	—	—	—	—	—	—	2.619e-05	4.58186	2.56	27	2.02186	0.232487	381.82	7	2	279.61	4	Not include in the manuscript main text
Synthetic	Miscellaneous Synthetic compounds	O=C(NCC1=CC=C(F)C=C1)C2=CC(C3=CC(Br)=CC=C3F)N4C(NC=N4)=N2	—	22.4	—	—	—	—	—	—	—	—	—	—	2.24e-05	4.64975	2.66	28	1.98975	0.227506	446.26	6	2	287.02	4	Not include in the manuscript main text
Synthetic	Miscellaneous Synthetic compounds	O=C(NC(C)C1=CC=CC=C1)C2=CC(C3=CC(Br)=CC=C3F)N4C(NC=N4)=N2	—	2.26	—	—	—	—	—	—	—	—	—	—	2.26e-06	5.64589	2.84	28	2.80589	0.276245	442.29	6	2	291.67	4
Synthetic	Miscellaneous Synthetic compounds	O=C(NCC1=CC=CC=C1)C2=CC(C3=CC(Br)=CC=C3F)N4C(NC=N4)=N2	—	23.35	—	—	—	—	—	—	—	—	—	—	2.335e-05	4.63171	2.56	27	2.07171	0.235017	428.27	6	2	280.67	4	Not include in the manuscript main text
Synthetic	Miscellaneous Synthetic compounds	O=C(NCC#C)C1=CC(C2=CC(Br)=CC=C2F)N3C(NC=N3)=N1	—	2.65	—	—	—	—	—	—	—	—	—	—	2.65e-06	5.57675	1.17	23	4.40675	0.332181	376.19	6	2	244.72	3
Synthetic	Miscellaneous Synthetic compounds	O=C(N(CC)C1=CC=CC=C1)C2=CC(C3=CC(Br)=CC=C3F)N4C(NC=N4)=N2	—	2.26	—	—	—	—	—	—	—	—	—	—	2.26e-06	5.64589	3.5	28	2.14589	0.276245	442.29	6	1	291.77	4
Synthetic	Miscellaneous Synthetic compounds	O=C(NC1=CC=C(Cl)C=C1)C2=CC(C3=CC(Br)=CC=C3F)N4C(NC=N4)=N2	—	22.28	—	—	—	—	—	—	—	—	—	—	2.228e-05	4.65208	3.45	27	1.20208	0.23605	448.68	6	2	282.33	3	Not include in the manuscript main text
Synthetic	Miscellaneous Synthetic compounds	O=C(NC1CCCCC1)C2=CC(C3=CC(Br)=CC=C3F)N4C(NC=N4)=N2	—	23.79	—	—	—	—	—	—	—	—	—	—	2.379e-05	4.62361	2.69	26	1.93361	0.243628	420.29	6	2	274.95	3	Not include in the manuscript main text
